# Supplementary material for: Out of the Closet and Into Our Data: An Analysis of LGBTQIA+ Inclusion Questions in National Health Surveys
Source: Research Square preprint supplement (doi:10.21203/rs.3.rs-7781272/v1), 2025-11-18
Supplement: Supplementary file 1 [file c90e349eb19f0dab8de2edbe.docx]

**Appendix A:**

BRFSS

- Sex
  - Are you male or female? Male Female
    - LL07 / LL09
  - What was your sex at birth? Was it male or female? Male Female don't know/Not sure Refused
    - MSAB.01
- Gender Identity
  - Do you consider yourself to be transgender? Yes, transgender, male-to female Yes, transgender, female to male Yes, transgender, nonconforming No Don't know/not sure Refused
    - MSOGI.02
- Gender Expression
  - None
- Sexual Attraction
  - None
- Sexual Orientation
  - Which of the following best represents how you think of yourself? Gay Straight, that is, not gay Bisexual Something else I don't know the answer Refused
    - MSOGI.01a
    - MSOGI.01b (depending on whether answered male or female): Which of the following best represents how you think of yourself? Lesbian or Gay Straight, that is, not gay Bisexual Something else I don't know the answer Refused
- Romantic Attraction
  - None
- Romantic Orientation
  - None
- Partnership
  - Are you... Married Divorced Widowed Separated Never married A member of an unmarried couple Refused
    - CDEM.05.
- Sexual Activities/Behaviors
  - None

MCBS

- Sex
  - [Are you/Is (SP)] male or female? Male Female
    - ROSTSEX IN11
- entity
  - None
- Gender Expression
  - None
- Sexual Attraction
  - None
- Sexual Orientation
  - None
- Romantic Attraction
  - None
- Romantic Orientation
  - None
- Partnership
  - Are you/Is (SP)/Was (SP)] married, widowed, divorced, separated, or never married? Married Widowed Divorced Separated Never Married Don't know Refused
    - SPMARSTA IN13
  - (Is/Was) (SP) married, widowed, divorced, separated, or never married? Never married Married Widowed Divorced Separated Don't know Refused
    - IMARSTAT INBQ13A
- Sexual Activities/Behaviors
  - None

NHANES

- Sex
  - {Are you/is {PERSON}} male or female? male female
    - SCQ131 ENW 508
    - For phone version : SCQ-EN-L-508 SCQ.130/131
  - What sex {were you/was SP} assigned at birth? Male Female Refuse Don't know
    - RIQ-L-508 Répondent Selection Section DMQ.510
- Gender Identity
  - What was the gender of the respondent? Male Female Doesn't identify as either
    - FCBS-CBQ-L-508 Special Follow-up Questions CBQ
- Gender Expression
  - None
- Sexual Attraction
  - None
- Sexual Orientation
  - None
- Romantic Attraction
  - None
- Romantic Orientation
  - None
- Partnership
  - {Are you/Is SP} now married, widowed, divorced, separated, never married or living with a partner? Married Widowed Divorced Separated Never Married Living with a partner Don't Know Refused
    - DMQ-L-508 Demographics DMQ.380
    - Allows for multiple individuals to be listed as spouse, partner
- Sexual Activities/Behaviors
  - None

# NHIS

- Sex
  - Male or female? Male Female Refused Don't Know
    - If no sex provided, enter best guess of male or female based on name
    - Enter your best guess of ^SANAME's sex Male Female
    - HHC.0210.00.1 SEX
  - What sex were you assigned at birth, on your original birth certificate? Male Female Refused Don't know
    - GNI.0010.01.4 ASAB1_A / GNI.0060.01.4 ASAB2_A
- Gender Identity
  - Do you currently describe yourself as a man, as a woman, or some other kind of way? Man Woman Some other kind of way Refused Don't know
    - Part of the above question: For those who identify their gender in some other way - How would you describe yourself? Verbatim Refused Don't know
    - GNI.0030.01.4 GENDSPEC1_A
    - GNI.0020.01.4 GENDER1_A
    - Do you currently describe yourself as male, female, or transgender? Male Female Transgender None of these Refused Don't know
      - Randomly assigned, so it’s this question or the first question.
      - GNI.0050.01.4 GENDSEPC2_A
      - Part of the above question: GNI.0040.01.4 GENDER2_A How would you describe yourself? Verbatim values; Refused; Don’t know.
- Gender Expression
  - None
- Sexual Attraction
  - None
- Sexual Orientation
  - Do you think of yourself as ^gaylesbian; straight, that is not ^gaylesbian; bisexual; something else; or you don't know the answer? ^gaylesbian straight, that is not ^gaylesbian bisexual Something else I don't know the answer refused don't know
    - ORN.0020.00.1 ORIENT_A
- Romantic Attraction
  - None
- Romantic Orientation
  - None
- Partnership
  - Are you married, living with a partner together as an unmarried couple, or neither? Married Living together as an unmarried couple Neither Refused Don't know
    - MAR.0010.00.1 MARITAL_A
    - Which person is your partner? multiple choice selection
    - Note: You can only choose one person as a partner
  - What is your current legal marital status? Are you married, widowed, divorced, or separated? Married Widowed Divorced Separated Refused don't know
    - MAR.0110.00.1 LEGALSTAT_A
  - Have you ever been married? Yes; No; Refused; Don’t know. --> (this question is the branch for who gets to see the question below)
    - MAR.0100.00.1 EVRMARRIED_A
  - Are you widowed, divorced, or separated? Windowed Divorced Separated Refused don't know
    - MAR.0120.00.1 WIDIVSEP_A
    - Asked of sample adults 18+ who are living with a partner but have been married.
  - Does your spouse not live here because you and your spouse are legally separated? Yes; No; Refused; Don’t know.
    - MAR.0060.00.1 SPOUSEP_A
- Sexual Activities/Behaviors
  - None

NIS

- Sex
  - What is your sex; male or female? Male Female Don't know Refused
    - NIS-ACM-Questionnaire-Q2-2022 ACM_SEX
- Gender Identity
  - This is a yes or no question: Would you describe yourself as transgender or nonbinary? Yes No Don't know Refused
    - NIS-ACM-Questionnaire-Q2-2022 ACM_TRANS
- Gender Expression
  - None
- Sexual Attraction
  - None
- Sexual Orientation
  - What best describes your sexual orientation? Is it heterosexual or straight; Lesbian or gay; Bisexual; or Something else? Heterosexual/Straight Lesbian or gay Bisexual Something else Don't know Refused
    - NIS-ACM-Questionnaire-Q2-2022 ACM_Q93
- Romantic Attraction
  - None
- Romantic Orientation
  - None
- Partnership
  - None
- Sexual Activities/Behaviors
  - None

NSCH

- Sex
  - What is the child's sex? Male Female
    - NSCH-S1 Household screener 3.
- Gender Identity
  - None
- Gender Expression
  - None
- Sexual Attraction
  - None
- Sexual Orientation
  - None
- Romantic Attraction
  - None
- Romantic Orientation
  - None
- Partnership
  - None
- Sexual Activities/Behaviors
  - None

NSFG

- Sex
  - Is (NAME) a male or female? Male Female NSFG 2017-2019
    - HH Screener CAPI HHPerson[1].SEX
- Gender Identity
  - None
- Gender Expression
  - None
- Sexual Attraction
  - People are different in their sexual attraction to other people. Which best describes your feelings? Are you....Only attracted to females Mostly attracted to females Equally attracted to females and males Mostly attracted to males Only attracted to males Not sure
    - NSFG 2017-2019 Female CAPIlite ATTRACT JH-2.
    - NSFG 2017-2019 Male CAPIlite ATTRACT KK-4.
- Sexual Orientation
  - Do you think of yourself as.... heterosexual or straight homosexual, gay, or lesbian or bisexual
    - NSFG 2017-2019 Female CAPIlite ORIENT_A JH-3a
  - Which of the following best represents how you think of yourself? lesbian or gay straight, that is not lesbian or gay bisexual something else
    - NSFG 2017-2019 Female CAPIlite ORIENT_B JH-3b
  - **Count JH-3a and JH-3b as one question, because participants only receive one question due to survey testing*
- Romantic Attraction
  - None
- Romantic Orientation
  - None
- Partnership
  - What is (NAME[X])'s relationship to you? Husband/Spouse Male unmarried partner ... Wife/Spouse Female unmarried partner....
    - NSFG 2017-2019 Male CAPI Lite Relar[X]AD-5.
  - What is your current marital or cohabitating status? Married to a person of the opposite sex Not married but living together with a partner of the opposite sex Widowed Divorced or Annulled Separated, because you and your spouse are not getting along Never been married
    - NSFG 2017-2019 Female CAPIlite AD-7b (MARSTAT)
  - What is your formal marital status? That is, are you widowed, divorced, separated, or have you never been married? Widowed Divorced or annulled Separated, because you and your spouse are not getting along Never been married
    - NSFG 2017-2019 Female CAPIlite AD-7c (FMARSTAT) [Asked if cohabitating i.e. MARSTAT=2];
    - NSFG 2017-2019 Male CAPIlite AD-7C (FMARSTAT)
  - At the time you first had sexual intercourse with (WIFE/PARTNER), how would you describe your relationship with her? Married to her engaged to her, and living together Engaged to her, but not living together Living together in a sexual relationship, but not engaged Going with her or going steady Going out with her once in a while Just friends Had just met Something else
    - NSFG 2017-2019 Male CAPI Lite CWPSX1RL CC3
    - NSFG 2017-2019 Female CAPIlite P1YRF CI-11.Please look at Card 24. At the time you first had sexual intercourse with (PARTNER'S NAME), how would you describe your relationship with him? ASKED IF R IS NOT MARRIED TO, SEPARATED FROM, OR COHABITING WITH THIS PARTNER. ALSO NOT ASKED IF THIS PARTNER WAS 1ST PARTNER Married to him; Engaged to him; Living together in a sexual relationship, but not engaged; Going with him or going steady; Going out with him once in a while; Just friends; Had just met him; Something else.
  - At the time you first had any sexual experience with a female partner, how would you describe your relationship with her? Married to her; Engaged to her; Living together in a sexual relationship, but not engaged; Going with her or going steady; Going out with her once in a while; Just friends; Had just met her; Something else.
    - NSFG 2017-2019 Female CAPIlite FSAMEREL JG-4a. Please look at Card 24.
  - At the time you last had sexual intercourse with (PARTNER'S NAME), how would you describe your relationship with him? ASKED IF R IS NOT A CURRENT PARTNER. ALSO NOT ASKED IF THIS PARTNER WAS 1ST PARTNER Married to him; Engaged to him; Living together in a sexual relationship, but not engaged; Going with him or going steady; Going out with him once in a while; Just friends; Had just met him; Something else.
    - NSFG 2017-2019 Female CAPIlite P1YOTHREL CI-7a
  - At the time you last had sexual intercourse with him, how would you describe your relationship with him? ASKED IF FIRST PARTNER IS NOT CURRENT AND IS NOT CURRENT HUSBAND OR COHABITING PARTNER Married to him; Engaged to him; Living together in a sexual relationship, but not engaged; Going with him or going steady; Going out with him once in a while; Just friends; Had just met him; Something else
    - NSFG 2017-2019 Female CAPIlite FPOTHREL CG-7a.
  - At the time you began living together, were you and he engaged to be married or did you have definite plans to get married? Yes, engaged to be married; Not engaged but had definite plans to get married; No, neither engaged nor had definite plans.
    - NSFG 2017-2019 Female CAPIlite CB-7 ENGAGHX
    - NSFG 2017-2019 Male CAPIlite ENGATHEN CA-7
    - NSFG 2017-2019 Female CAPIlite CPENGAG1 CC-6 (ASKED IF R HAS EVER HAD A CHILD AND IS CURRENTLY COHABITING)
    - NSFG 2017-2019 Female CAPIlite ENGAG1CX CD-8.
    - NSFG 2017-2019 Male CAPIlite ENGAG1CX CD-8
  - Do you consider him to be a current sexual partner? ASKED ONLY IF R IS NOT CURRENTLY MARRIED OR COHABITING Yes; No
    - NSFG STILFPSX CG-6.
    - NSFG 2017-2019 Female CAPIlite P1YCURRP CI-7. Do you consider (PARTNER'S NAME) to be a current sexual partner? IF R IS NOT MARRIED TO, SEPARATED FROM, OR COHABITING WITH THIS PARTNER. ALSO NOT ASKED IF THIS PARTNER WAS 1ST PARTNER Yes; No
  - How would you describe your current relationship with (PARTNER'S NAME)? ASKED IF THIS IS A CURRENT SEXUAL PARTNER, BUT NOT R’s CURRENT H/P OR R’s FIRST PARTNER, AND RELATIONSHIP HAS LASTED LONGER THAN 1 MONTH Engaged to him; Living together in a sexual relationship, but not engaged; Going with him or going steady; Going out with him once in a while; Just friends; Had just met him; Something else.
    - NSFG 2017-2019 Female CAPIlite P1YRN CI-17. Please look at Card 85.
  - How would you describe your current relationship with (FIRST PARTNER)? ASKED IF FIRST PARTNER IS CURRENT, BUT NOT A COHABITING OR MARITAL PARTNER Engaged to him; Going with him or going steady; Going out with him once in a while; Just friends; Had just met him; Something else.
    - NSFG 2017-2019 Female CAPIlite FPRN CG-7f.
  - Please look at this screen. Is (FIRST PARTNER) someone we talked about earlier? That is, was he someone you’ve been married to or lived with? ASKED ONLY IF R HAS EVER BEEN MARRIED OR EVER COHABITED
    - NSFG 2017-2019 Female CAPIlite SAMEMAN CG-2.
  - (Including your present marriage,) how many times have you been married? Number ______
    - NSFG 2017-2019 Male CAPIlite AG-2 TIMESMAR is same item
    - NSFG 2017-2019 Female CAPIlite TIMESMAR CA-1
  - Some couples live together without being married. By living together, we mean having a sexual relationship while sharing the same usual address. Did you and (HUSBAND) live together before you got married? Yes/No
    - NSFG 2017-2019 Male CAPIlite LIVTOGWF CA-4 is similar
    - NSFG 2017-2019 Female CAPIlite CB-5 LVTOGHX
  - Not counting anyone we've already talked about, have you ever lived together with any other man? Yes; No. (Note that this defines living together as having a sexual relationship … “Some couples live together without being married. By living together, we mean having a sexual relationship while sharing the same usual address.”)
    - NSFG 2017-2019 Male CAPIlite EVCOHAB1 AG-3. Not including the (woman/women) you married, have you ever lived together with any other female sexual partner? By living together, I mean having a sexual relationship while sharing the same usual residence.
    - NSFG 2017-2019 Female CAPIlite LIVEOTH CD-1.
  - How did your Nth marriage end? Death of husband; Divorce; Annulment
    - NSFG 2017-2019 Female CAPIlite CB-19 MARENDHX
    - Lines up with NSFG 2017-2019 Male CAPIlite WIFEDIED_M/WIFEDIED_Y DB-8
  - In the last 12 months, did you have sex with any males who were also having sex with other people at around the same time? Yes; No.
    - NSFG 2017-2019 Female CAPIlite **NONMONOG** JF-4.
  - To the best of your knowledge, how many of your male sexual partners in the last 12 months were having sex with other people around the same time? 1 partner; 2 or more partners.
    - NSFG 2017-2019 Female CAPIlite **NNONMONOG1** JF-5a.
  - (Thinking of your 1 male partner in the last 12 months), how many other partners do you think this partner had around the same time as he was having sex with you? 1 other partner besides you; 2 other partners besides you; 3 or more other partners besides you.
    - NSFG 2017-2019 Female CAPIlite **NNONMONOG**2 JF-5b.
    - The following item is asked IF **NONMONOG=**1 AND R HAD AT LEAST 2 MALE PARTNERS WHO HAD SEX WITH OTHER PEOPLE DURING THE PAST 12 MONTHS. I interpret this to be the same question as **NNONMONOG**2 but asked of the people who answered NNONMONOG1 as “2 or more partners,” rather than “1 partner” … **NNONMONOG3** JF-5c. Thinking of your most recent male partner who had other sexual partners, how many other partners do you think he had around the same time as he was having sex with you? 1 other partner besides you; 2 other partners besides you; 3 or more other partners besides you.
  - Counting all your male sexual partners, even those you had intercourse with only once, how many men have you had sexual intercourse with in your life? Number _______
    - NSFG 2017-2019 Female CAPIlite LIFEPRT CH-1
    - MALE VERSION: NSFG 2017-2019 Male CAPIlite LIFEPRT BC-6 … Please look at Card 14. How many different females have you ever had intercourse with? This includes any female you had intercourse with, even if it was only once or if you did not know her well. None; One; Two; Three; Four; Five; Six; 7 or more
  - Altogether, how many different females have you ever had sexual intercourse with? This includes any female you had intercourse with, even if it was only once or if you did not know her well. Number of partners __________
    - NSFG 2017-2019 Male CAPIlite NUMLIFE FE-1.
  - Thinking about your entire life, how many male sex partners have you had? Please count every partner, even those you had sex with only once. Number _______
    - NSFG 2017-2019 Female CAPIlite PARTSLIF JF-1.
  - Thinking about the last 12 months, how many male sex partners have you had in the 12 months since (INTERVIEW MONTH)? Please count every partner, even those you had sex with only once in those 12 months.Number _______
    - NSFG 2017-2019 Female CAPIlite PARTS12M JF-2
  - During the last 12 months, that is, since (INTERVIEW MONTH, INTERVIEW YEAR - 1)), how many men, if any, have you had sexual intercourse with? Please count every male sexual partner, even those you had sex with only once. Number ___________
    - NSFG 2017-2019 Female CAPIlite MON12PRT CH-3
  - Please look at Card 15. How many different females have you had sexual intercourse with in the past 12 months, that is, since (INTERVIEW MONTH, INTERVIEW YEAR - 1)? None; One; Two; Three; Four; Five; Six; 7 or more
    - NSFG 2017-2019 Male CAPIlite MON12PRT BC-8
    - VERSION FOR MALE WITH ONE PARTNER IN LIFETIME: (The next questions are about relationships with females. You said that you had sexual intercourse with a female once in your life. Was that in the last 12 months,/ Have you had sexual intercourse with this female in the last 12 months,) that is, since (INTERVIEW MONTH, INTERVIEW YEAR - 1)? NSFG 2017-2019 Male CAPIlite SXMON12 BC-7.
    - FOLLOW UP IF R ANSWERS “7 or more”: Altogether, how many different females have you had sexual intercourse with in the past 12 months, that is, since (INTERVIEW MONTH, INTERVIEW YEAR - 1)? Number of partners _______________
    - NSFG 2017-2019 Male CAPIlite NUM12MO FE-2
  - How many male sexual partners did you have before you got married in [DATE OF FIRST MARRIAGE]? Please count your [first/former] husband, if you had sex with him before the marriage. _____
    - NSFG 2017-2019 Female CAPIlite PTSB4MAR CH-2
  - Thinking about your entire life, how many female sex partners have you had?
    - NSFG 2017-2019 Female CAPIlite FEMPARTS JG-2
  - How many female sex partners have you had in the 12 months since (interview month)?
    - NSFG 2017-2019 Female CAPIlite FEMPRT12JG-3
  - The very last time you had any type of sex -- that is vaginal intercourse or anal sex or oral sex -- was that last sexual partner male or female? ASKED ONLY IF R REPORTED HAVING SEX WITH BOTH MALES & FEMALES. Male; Female.
    - NSFG 2017-2019 Female CAPIlite MFLASTP JH-1.
  - Thinking about your entire life, how many male sex partners have you had? _____
    - NSFG 2017-2019 Female CAPIlite PARTSLIF JF-1.
- Sexual Activities/Behaviors
  - Now please think about the last four weeks. How many times have you had sexual intercourse with a male in the last four weeks? Number _________
    - NSFG 2017-2019 Female CAPIlite PST4WKSX EL-1
    - MALE EQUIVALENT: NSFG 2017-2019 Male CAPIlite SEXFREQ Now please think about the last four weeks. How many times have you had sexual intercourse with a female in the last four weeks? Number of times ______
  - Have you ever put your penis in another male's anus or butt (insertive anal sex)? Yes No
    - NSFG 2017-2019 Male CAPIlite ANALSEX3 KH-4
  - Has a male ever put his penis in your vagina (also known as vaginal intercourse)? ASKED IF R HAS NEVER MARRIED, NEVER COHABITED, NEVER BEEN PREGNANT (BASED ON CAPI OR ACASI). Yes; No.
    - NSFG 2017-2019 Female CAPIlite VAGSEX JD-1.
  - The next few questions are about oral sex. By oral sex, we mean stimulating the genitals with the mouth. Has a male ever performed oral sex on you? Yes; No.
    - NSFG 2017-2019 Female CAPIlite GETORALM JD-6.
  - Has another female ever performed oral sex on you? Yes; No.
    - NSFG 2017-2019 Female CAPIlite GETORALF JG-1b.
  - Has another male ever performed oral sex on you, that is, stimulated your penis with his mouth? Yes No
    - NSFG 2017-2019 Male CAPIlite GETORALM KH-2
  - Have you ever performed oral sex on a male? That is, have you ever stimulated his penis with your mouth? Yes; No.
    - NSFG 2017-2019 Female CAPIlite GIVORALM JD-7.
  - Has a male ever put his penis in your rectum or butt (also known as anal sex)? Yes; No.
    - NSFG 2017-2019 Female CAPIlite ANALSEX JD-9.
  - Has another male ever put his penis in your anus or butt (receptive anal sex)? Yes No
    - NSFG 2017-2019 Male CAPIlite ANALSEX2 KH-3.
  - At any time in your life, have you ever had sexual intercourse with a man, that is, made love, had sex, or gone all the way? Yes; No.
    - NSFG 2017-2019 Female CAPIlite EVERSEX CE-1.
  - Have you ever had sexual intercourse with a female (sometimes this called making love, having sex, or going all the way)? yes no
    - NSFG 2017-2019 Male CAPIlite EVERSEX BA-1
  - Have you had sexual intercourse more than once? Yes No
    - NSFG 2017-2019 Female CAPIlite SXMTONCE CE-9 ASKED ONLY IF R HAS NEVER BEEN MARRIED AND NEVER COHABITED
    - NSFG 2017-2019 Male CAPIlite SXMTONCE BA-2 Have you had sexual intercourse more than once? Yes No ASKED IF R NEVER MARRIED, NEVER COHABITED BUT HAD SEX
  - Since your first menstrual period, have you had sexual intercourse? NOTE: Do not count oral sex, anal sex, heavy petting, or other forms of sexual activity that do not involve vaginal penetration. Yes No
    - NSFG 2017-2019 Female CAPIlite SEXAFMEN CG-9
  - Your number of male partners in the last 12 months is displayed below. Thinking of your male partners in the last 12 months, with how many of them did you have vaginal intercourse?
    - NSFG 2017-2019 Female CAPIlite VAGNUM12 JF-2YRa
  - (Your number of male partners in the last 12 months is displayed below.) Thinking of your male partners in the last 12 months, with how many of them did you have oral sex, either giving or receiving?
    - NSFG 2017-2019 Female CAPIlite ORALNUM12 JF-2YRb
  - (Your number of male partners in the last 12 months is displayed below.) Thinking of your male partners in the last 12 months, with how many of them did you have anal sex?
    - NSFG 2017-2019 Female CAPIlite ANALNUM12 JF-2YRc.
  - Thinking of your male partners in the last 12 months, with how many of them did you have receptive anal sex where he put his penis in your anus (butt)? ___________
    - NSFG 2017-2019 Male CAPIlite RECEPANAL12 KJ-2YRb.
  - Thinking of your male partners in the last 12 months, with how many of them did you have insertive anal sex where you put your penis in his anus (butt)? _______
    - NSFG 2017-2019 Male CAPIlite INSERANAL12 KJ-2YRc
  - Have you ever performed oral sex on another female? yes no
    - NSFG 2017-2019 Female CAPIlite GIVORALF JG-1a
  - Have you ever performed oral sex on another male, that is, stimulated his penis with your mouth? Yes No
    - NSFG 2017-2019 Male CAPIlite GIVORALM KH-1
  - Have you ever had any other sexual experiences of any kind with another male? Yes No
    - NSFG 2017-2019 Female CAPIlite FEMSEX JG-1c. Have you ever had any sexual experience of any kind with another female? ASKED IF R HAS NOT ALREADY REPORTED ORAL SEX WITH A FEMALE. Yes; No. Equivalent for female survey
  - Since ([DATE OF FIRST SEX]/ January [YEAR OF INTERVIEW - 3]], have there been any times when you were not having intercourse at all for one month or more? Yes; No
    - NSFG 2017-2019 Female CAPIlite INTR-EC3 EC-3.
  - Your number of male partners in the last 12 months is displayed below. Thinking of your male partners in the last 12 months, with how many of them did you have vaginal intercourse? DISPLAY:___ male partners in last 12 months.
    - NSFG 2017-2019 Female CAPIlite VAGNUM12 JF-2YRa.
  - (Your number of male partners in the last 12 months is displayed below.) Thinking of your male partners in the last 12 months, with how many of them did you have oral sex, either giving or receiving? DISPLAY:___ male partners in last 12 months. Asked if R has ever had oral sex with a male.
    - NSFG 2017-2019 Female CAPIlite ORALNUM12 JF-2YRb.
  - (Your number of male partners in the last 12 months is displayed below.) Thinking of your male partners in the last 12 months, with how many of them did you have anal sex? DISPLAY:___ male partners in last 12 months. Asked if R has ever had anal sex with a male.
    - NSFG 2017-2019 Female CAPIlite ANALNUM12 JF-2YRc.
  - The very last time you had any type of sex -- that is vaginal intercourse or anal sex or oral sex -- was that last sexual partner male or female? ASKED ONLY IF R REPORTED HAVING SEX WITH BOTH MALES & FEMALES. Male; Female.
    - NSFG 2017-2019 Female CAPIlite MFLASTP JH-1.

NSDUH

- Sex
  - None
- Gender Identity
  - INTERVIEWER: Record respondent's gender. Male Female
    - QD01
- Gender Expression
  - None
- Sexual Attraction
  - People are different in their sexual attraction to other people. Which statement best describes your feelings? I am only attracted to females I am mostly attracted to females I am equally attracted to females and males I am mostly attracted to males I am only attracted to males I am not sure
    - QD62 [IF CURNTAGE = 18 OR OLDER]
- Sexual Orientation
  - Which of the following do you consider yourself to be? Heterosexual, that is, straight Lesbian or Gay Bisexual
    - QD63 [IF CURNTAGE = 18 OR OLDER]
- Romantic Attraction
  - None
- Romantic Orientation
  - None
- Partnership
  - Are you now married, widowed, divorced or separated, or have you never married? Married Widowed Divorced or separated Have never married
    - QD07 [IF CURNTAGE = 15 OR OLDER]
  - How many times have you been married? NUMBER OF TIMES: _______.
    - QD08 [IF QDO7 = 1 OR 2 OR 3]
- Sexual Activities/Behaviors
  - None

PATH

- Sex
  - What is your sex? Male Female Don't know Refused
    - Adult Questionnaire R07_AM004_RS
    - Youth Questionnaire R07_YM0004_NB is same
- Gender Identity
  - Do you consider yourself to be transgender? Yes No DON'T KNOW REFUSED
    - Adult Questionnaire R07-AM0062
    - Youth Questionnaire R07_YM0062 is same
  - Do you consider yourself to be male-to-female, female-to-male, or non-conforming? Yes, Transgender, male to female Yes, Transgender, female to male Yes, Transgender, gender nonconforming No Not sure DON'T KNOW REFUSED
    - Adult Questionnaire: R02_AM0062
    - Youth Questionnaire: R07_YM0062 is same
- Gender Expression
  - None
- Sexual Attraction
  - To whom have you felt sexually attracted, even if you did not take any action based on feeling attracted? Only to females, never to males Mostly to females, and at least once to a male About equally often to females and to males Mostly to males, and at least once to a female Only to males, never to females I have never felt sexually attracted to anyone at all DON'T KNOW REFUSED
    - Adult Questionnaire R07_AM0021
    - Youth Questionnaire R07_YM0021
- Sexual Orientation
  - Do you consider yourself to be... Straight Lesbian or gay Bisexual Something else DON'T KNOW REFUSED
    - Adult Questionnaire R07_AM0063
    - Youth Questionnaire R07_YM0063
- Romantic Attraction
  - None
- Romantic Orientation
  - None
- Partnership
  - What is your marital status? Are you now married, widowed, divorced, separated, or never married? No married Widowed Divorced Separated Never married Don't know Refused
    - Adult Questionnaire R07-AT0047
    - Parent Questionnaire R07-PT0047
- Sexual Activities/Behaviors
  - None

PRAMS

- Sex
  - None
- Gender Identity
  - None
- Gender Expression
  - None
- Sexual Attraction
  - None
- Sexual Orientation
  - None
- Romantic Attraction
  - None
- Romantic Orientation
  - None
- Partnership
  - When you got pregnant, what relationship did you have with your new baby’s father? Check ONE answer He was my husband (legally married) He was my partner (not legally married) He was my boyfriend He was a friend Other Please tell us: _____
    - Standard Core Questions #P2
  - Do you have a husband or partner who lives with you now? No; Yes
    - Standard Core Questions #P5
    - This question is about things that may have happened during the 12 months before your new baby was born. For each item, check No if it did not happen to you or Yes if it did. (It may help to look at the calendar when you answer these questions.)
  - I got separated or divorced from my husband or partner. No; Yes
    - Standard Core Questions #P19
- Sexual Activities/Behaviors
  - None

YRBSS

- Sex
  - What is your sex? Female Male
    - National-HS #2
- Gender Identity
  - None
- Gender Expression
  - None
- Sexual Attraction
  - None
- Sexual Orientation
  - Which of the following best describes you? Heterosexual (straight) Gay or lesbian Bisexual Not sure
    - National-HS #68
- Romantic Attraction
  - None
- Romantic Orientation
  - None
- Partnership
  - During your life, with how many people have you had sexual intercourse? I have never had sexual intercourse 1 person 2 people 3 people 4 people 5 people 6 or more people
    - National-HS #62
  - During the past 3 months, with how many people did you have sexual intercourse? I have never had sexual intercourse I have had sexual intercourse, but not during the past 3 months 1 person 2 people 3 people 4 people 5 people 6 or more people
    - National-HS #63
  - With how many people have you ever had sexual intercourse? I have never had sexual intercourse 1 person 2 people 3 people 4 people 5 people 6 or more people
    - National-MS #36
    - National-MS #60
  - During your life, with whom have you had sexual contact? I have never had sexual contact Females Males Females and Males
    - National-HS #67
- Sexual Activities/Behaviors
  - Have you ever had sexual intercourse? Yes No
    - National-HS #60
    - National-HS #60 (Standard-HS; and Standard-MS)
